# Supplementary material for: Novel ANO1 Inhibitor from Mallotus apelta Extract Exerts Anticancer Activity through Downregulation of ANO1
Source: MDPI journal article supplement (doi:10.3390/ijms21186470), 2020-09-04
Supplement: s1 [file s1]

# SUPPLEMENTARY MATERIAL

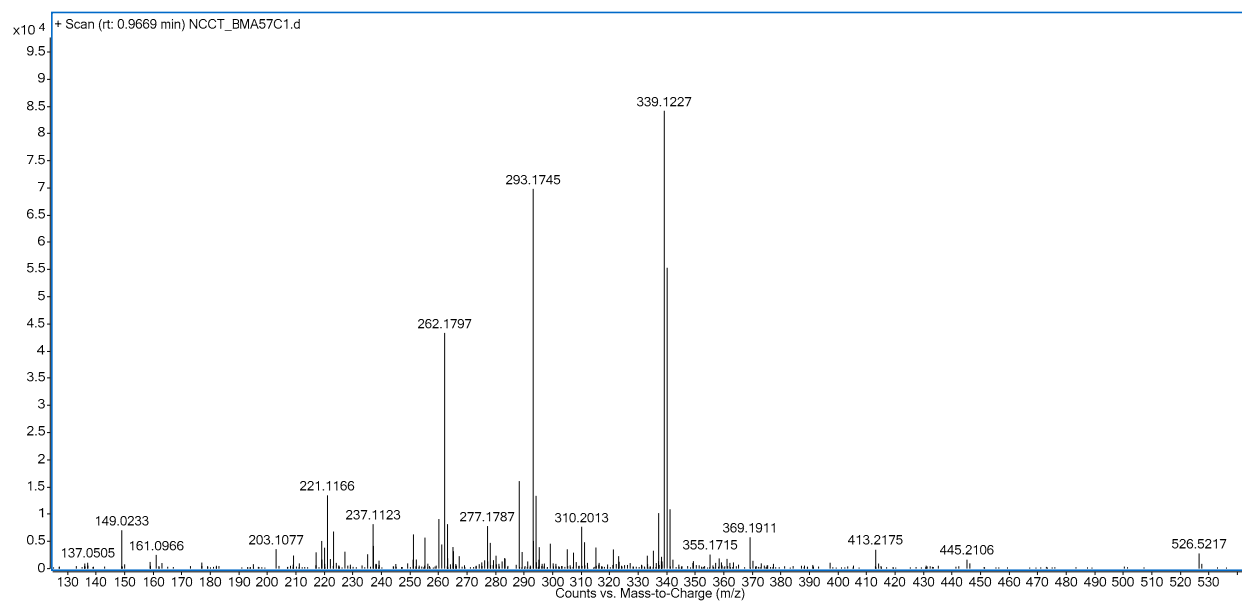

Figure S1. HR-ESI-MS of compound 1

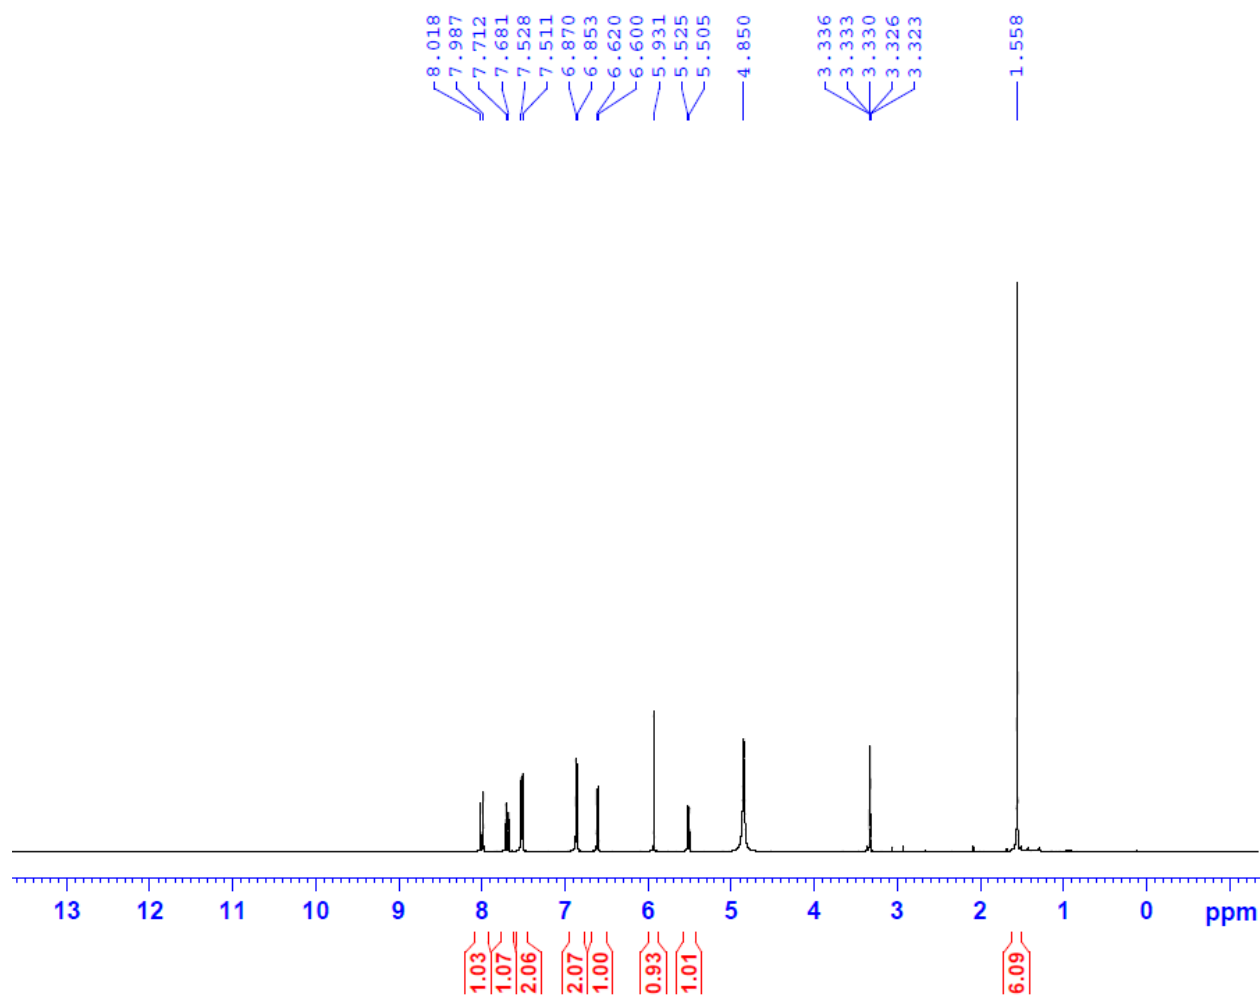

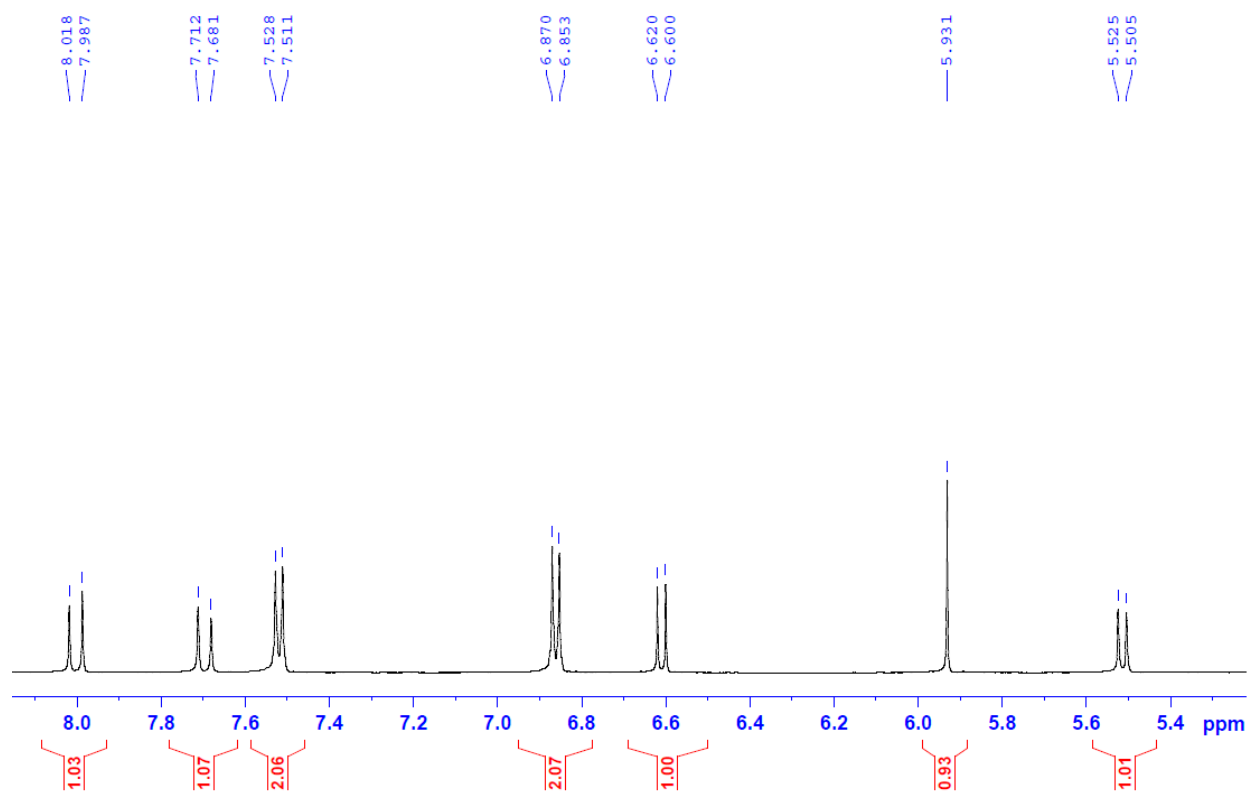

Figure S2. <sup>1</sup>H-NMR spectrum of compound 1

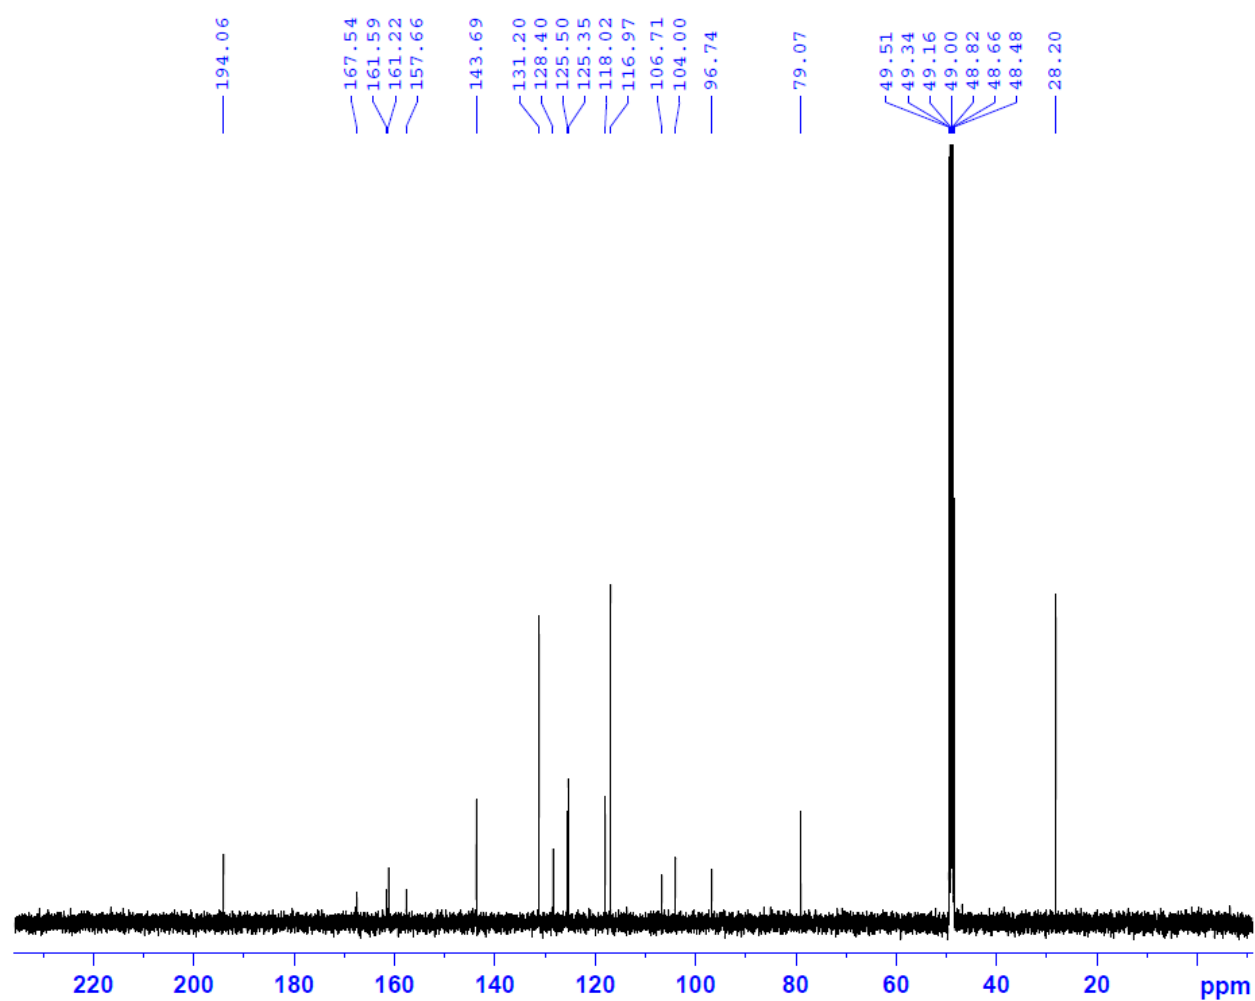

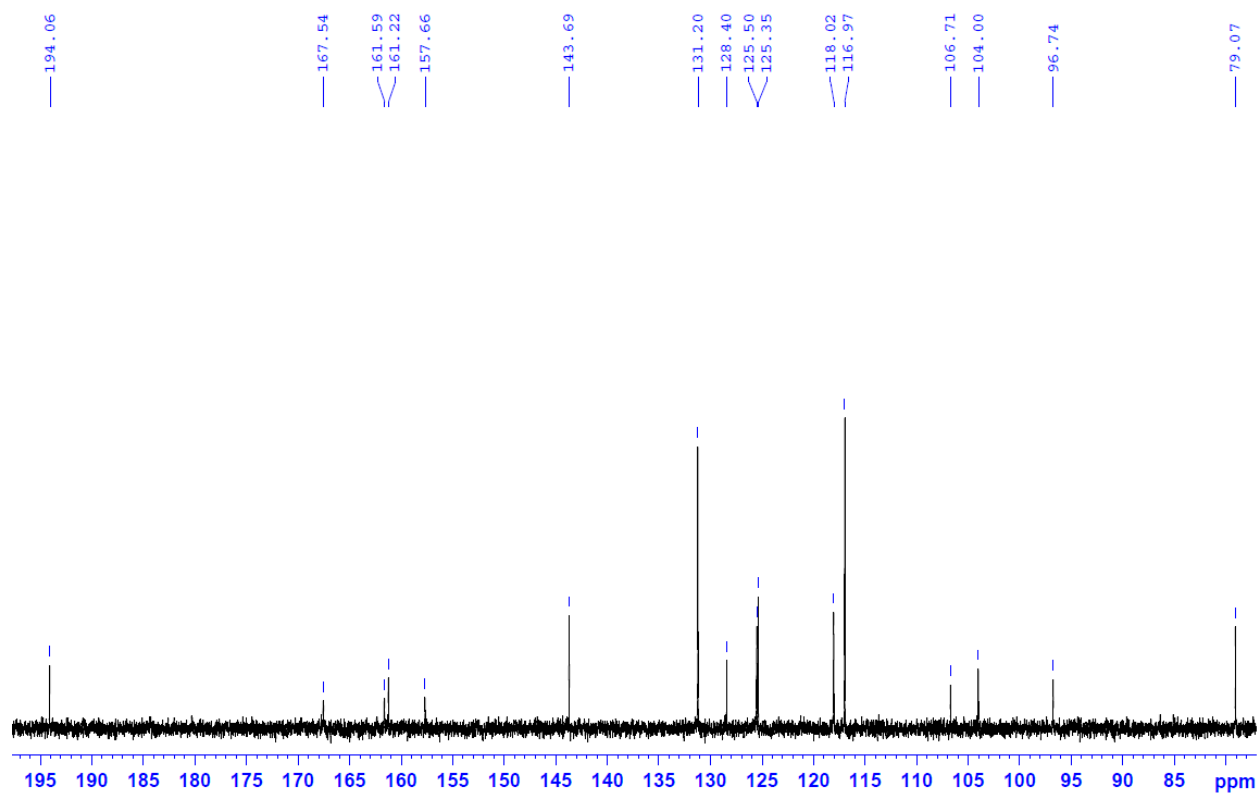

Figure S3.  $^{13}\text{C}$ -NMR spectrum of compound 1

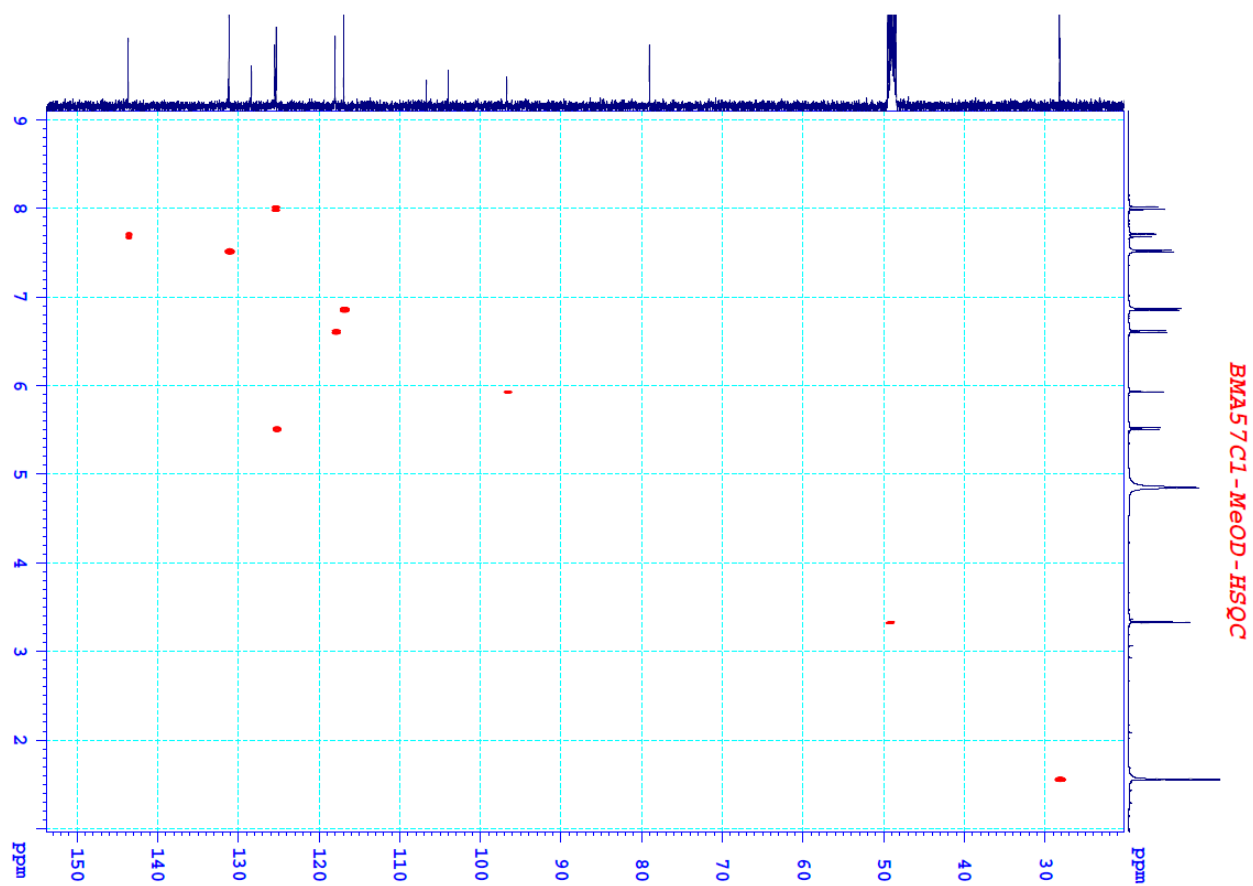

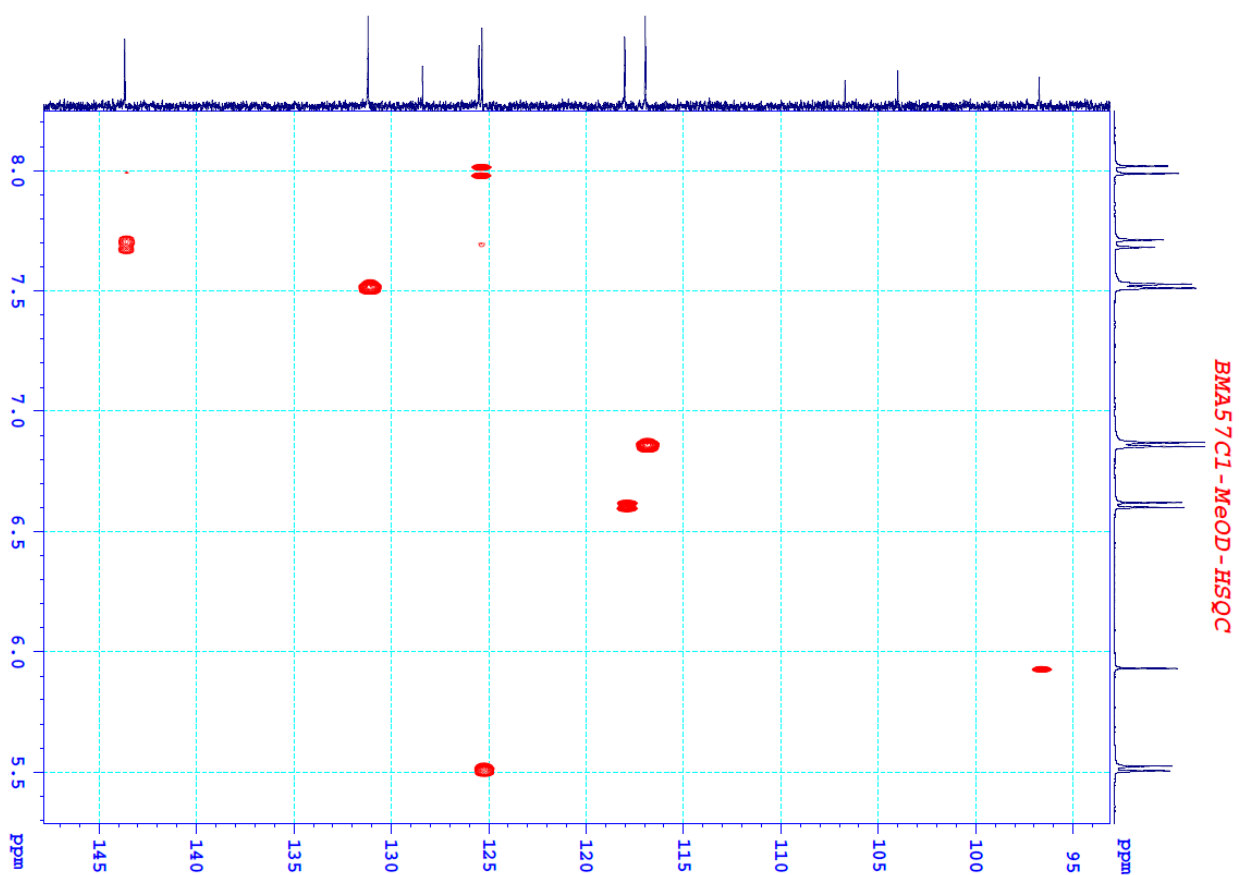

Figure S4. HSQC spectrum of compound 1

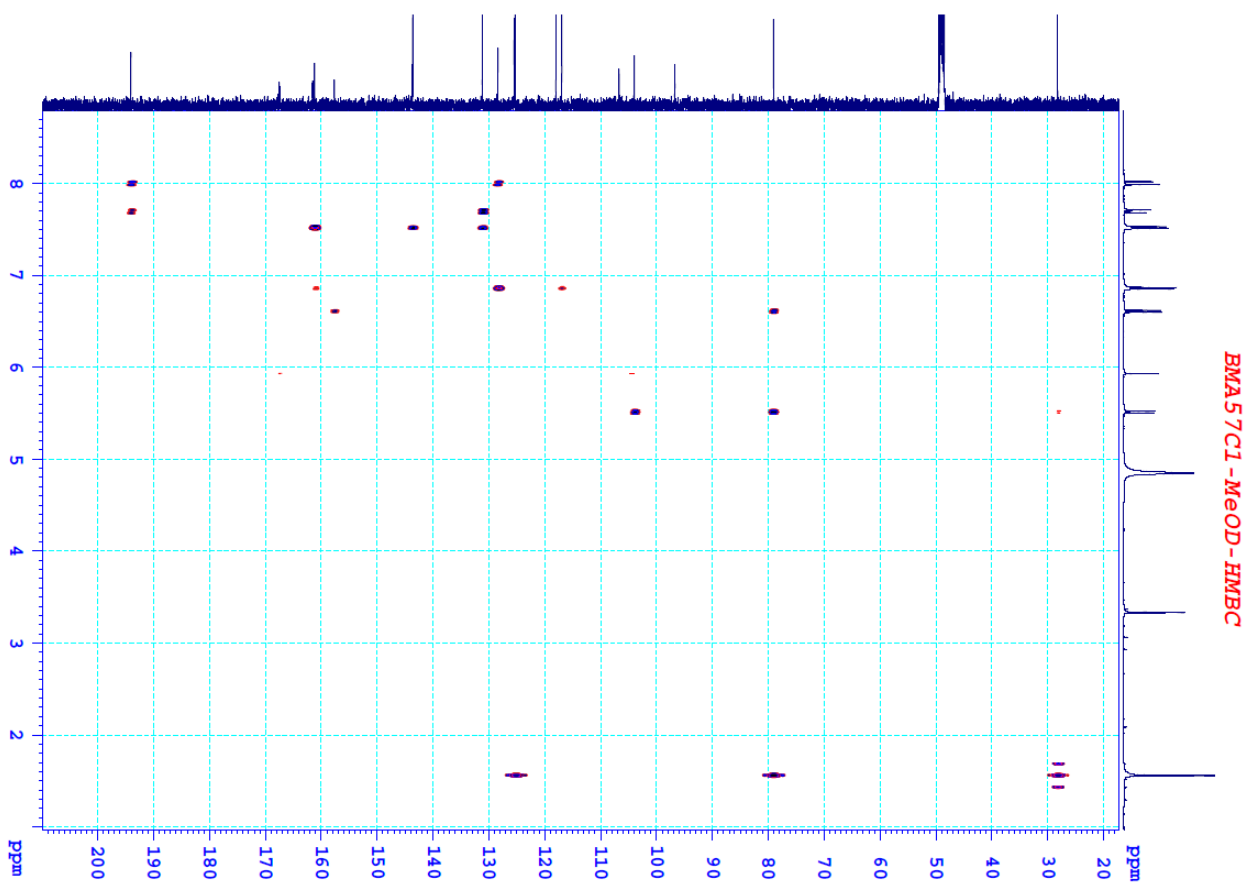

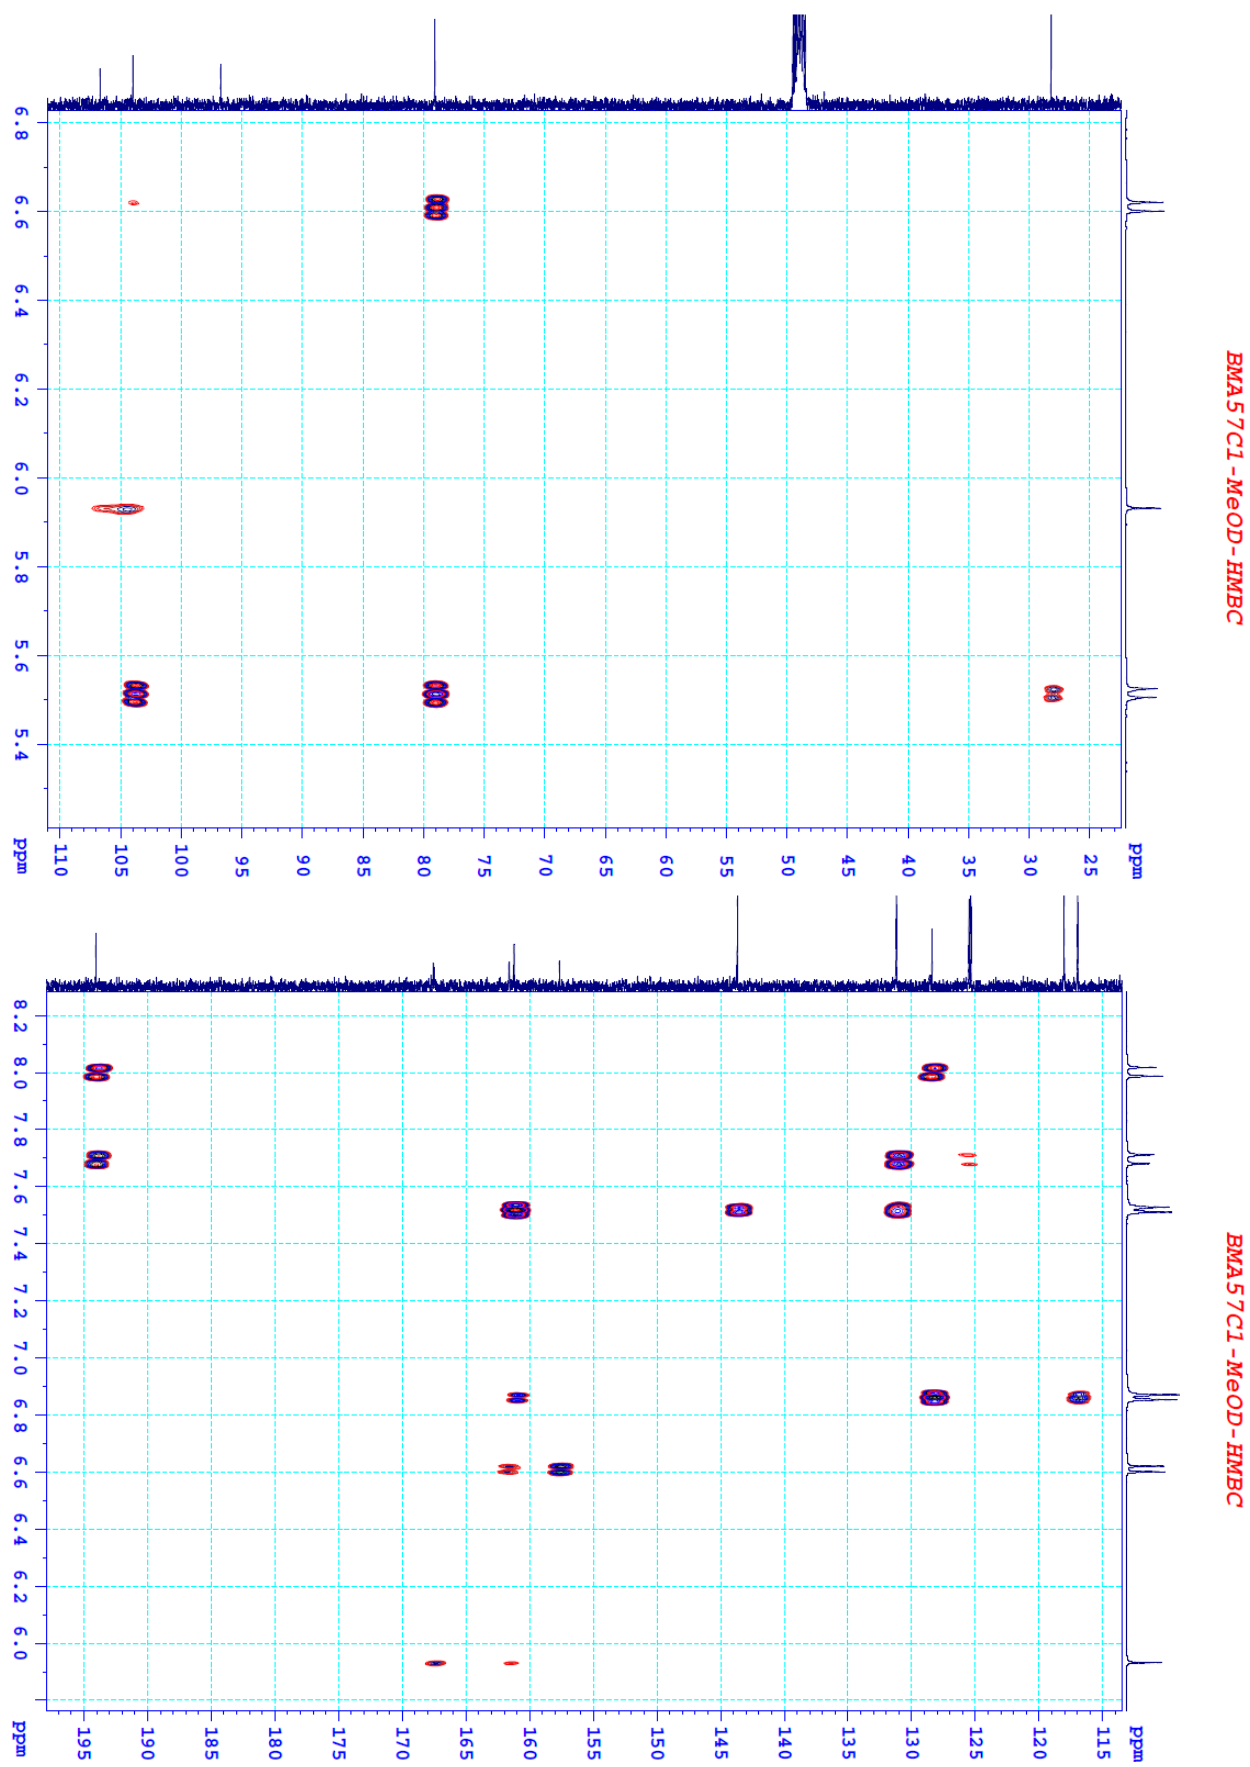

Figure S5. HMBC spectrum of compound 1

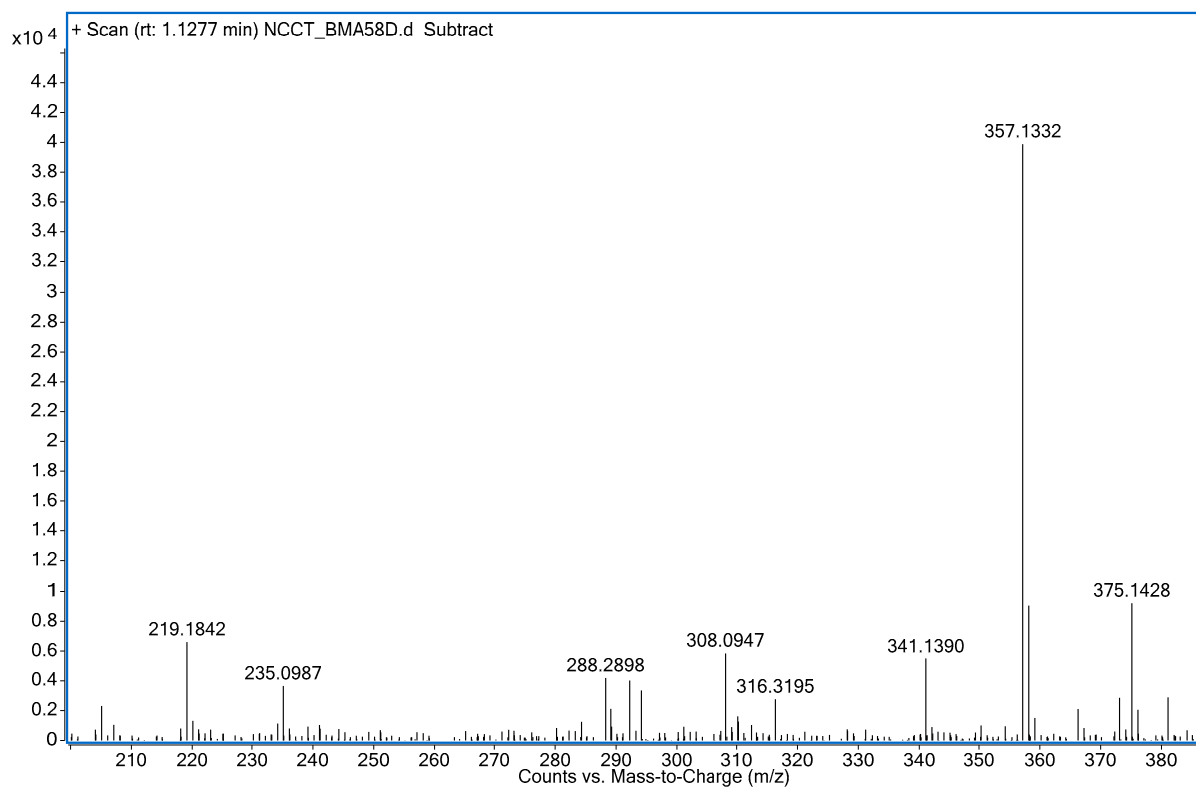

Figure S6. HR-ESI-MS of compound 2

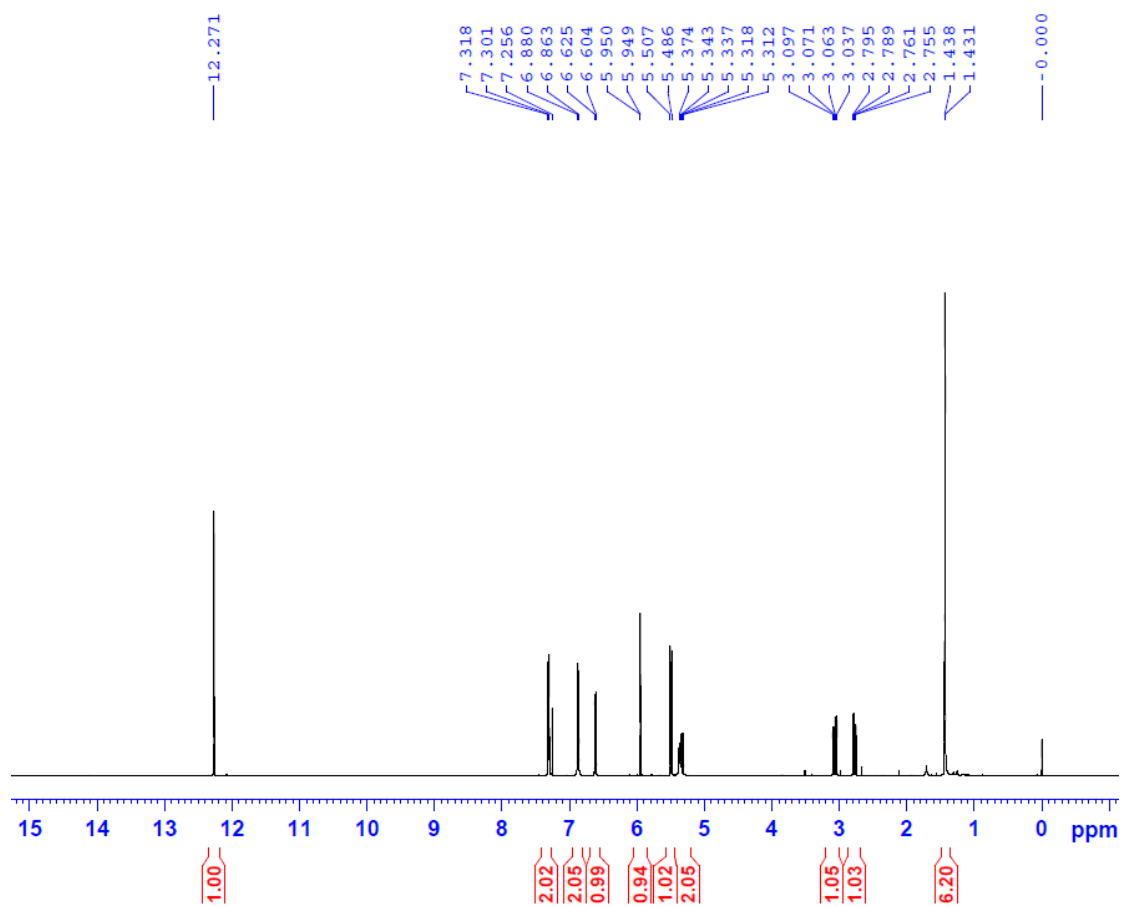

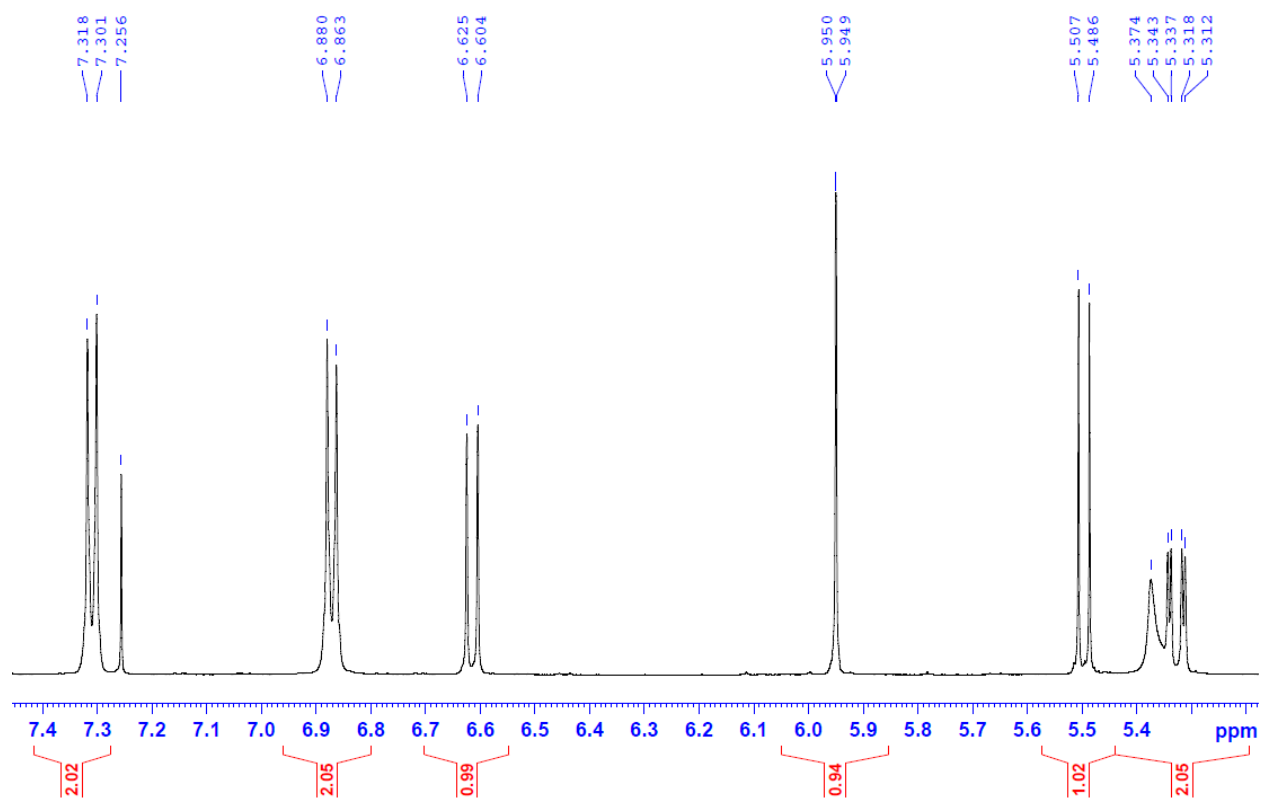

Figure S7. <sup>1</sup>H-NMR spectrum of compound 2

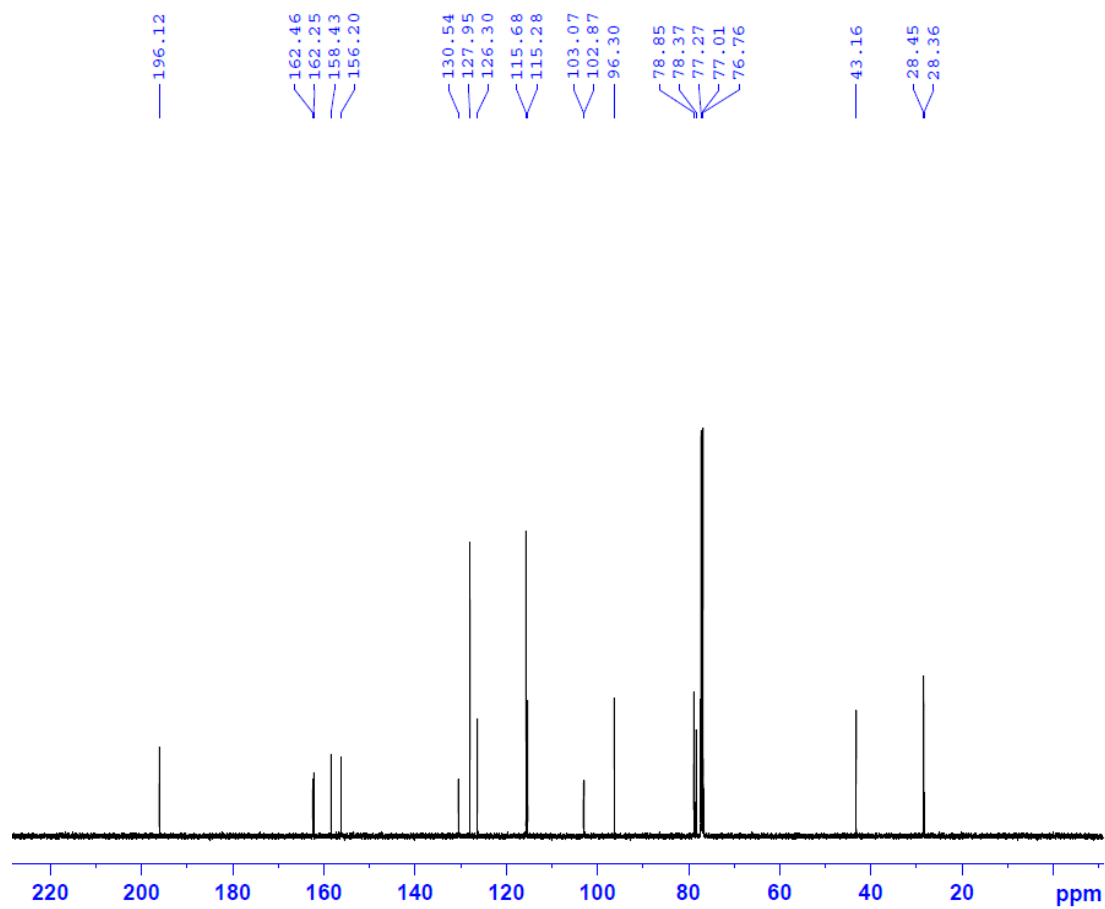

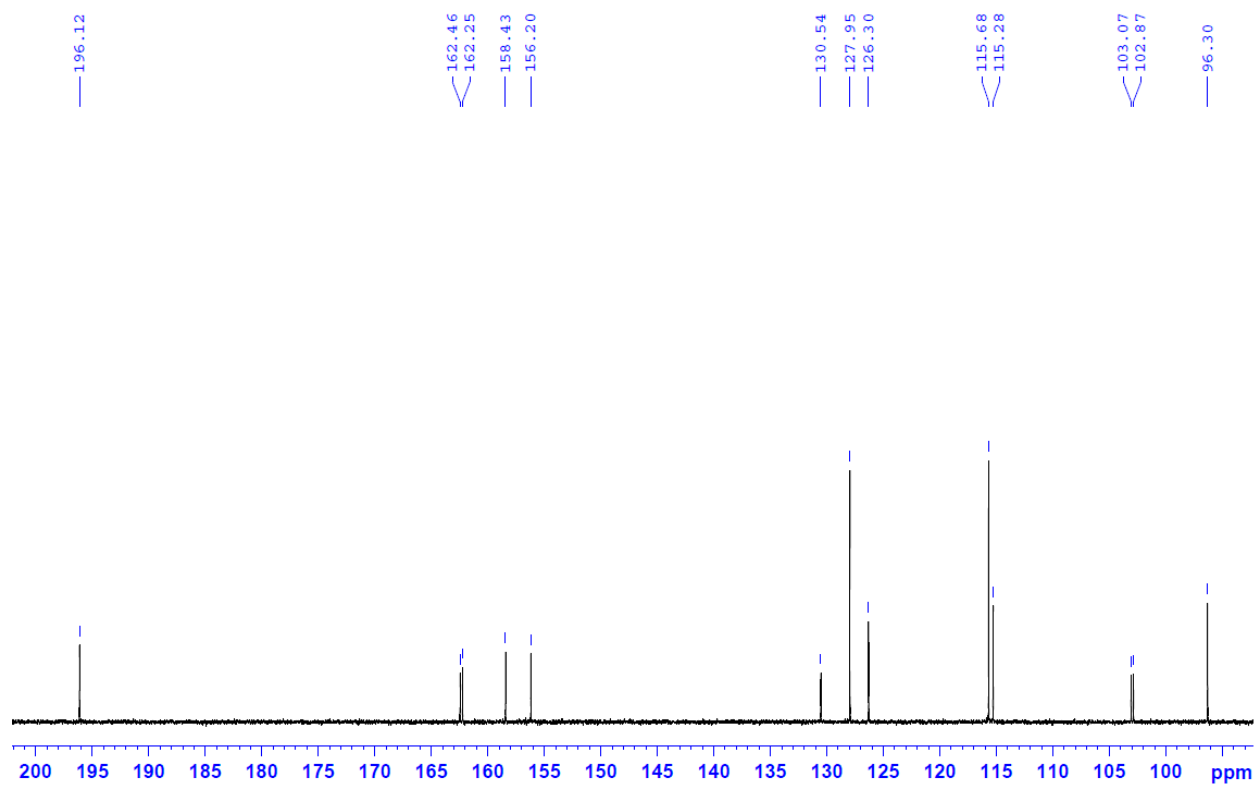

Figure S8. <sup>13</sup>C-NMR spectrum of compound 2

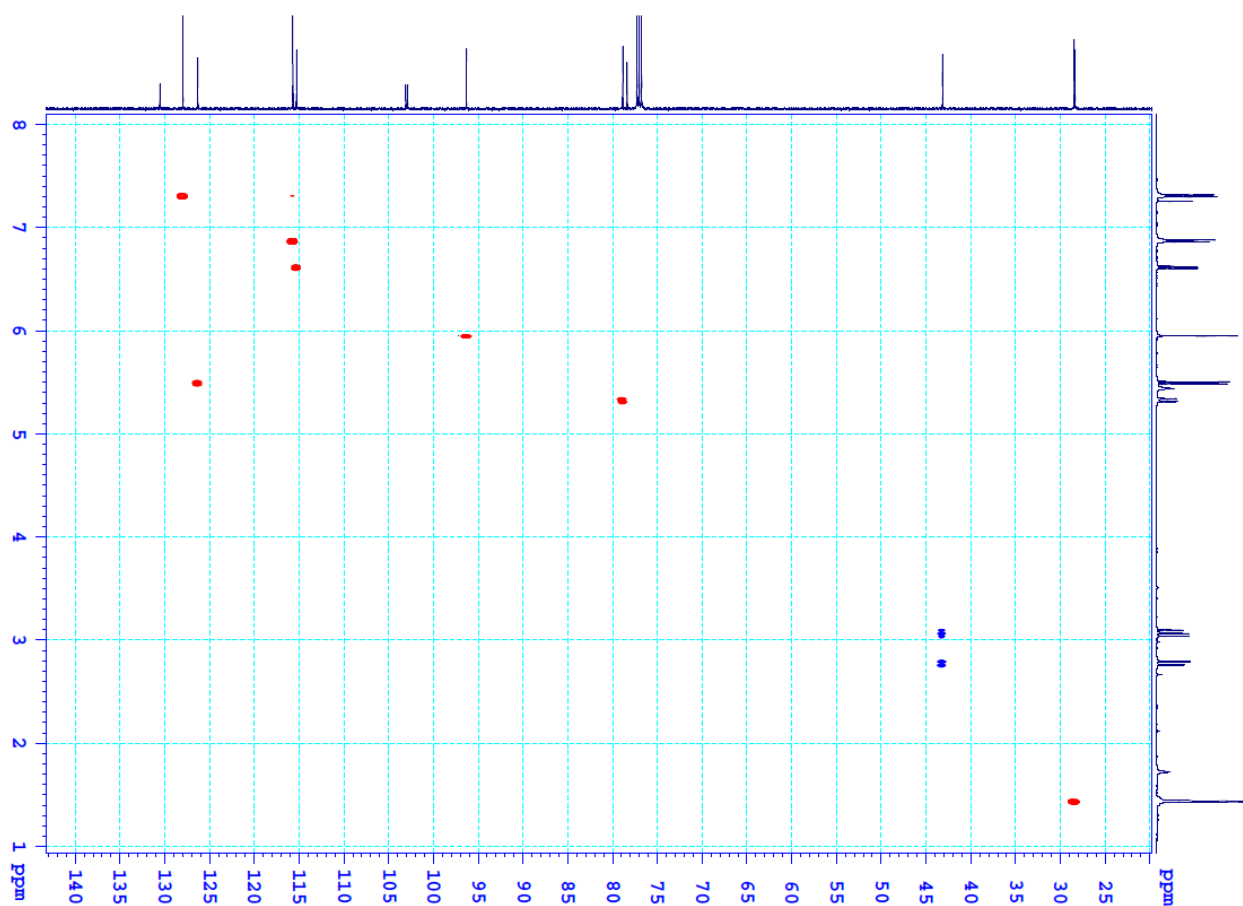

Figure S9. HSQC spectrum of compound 2



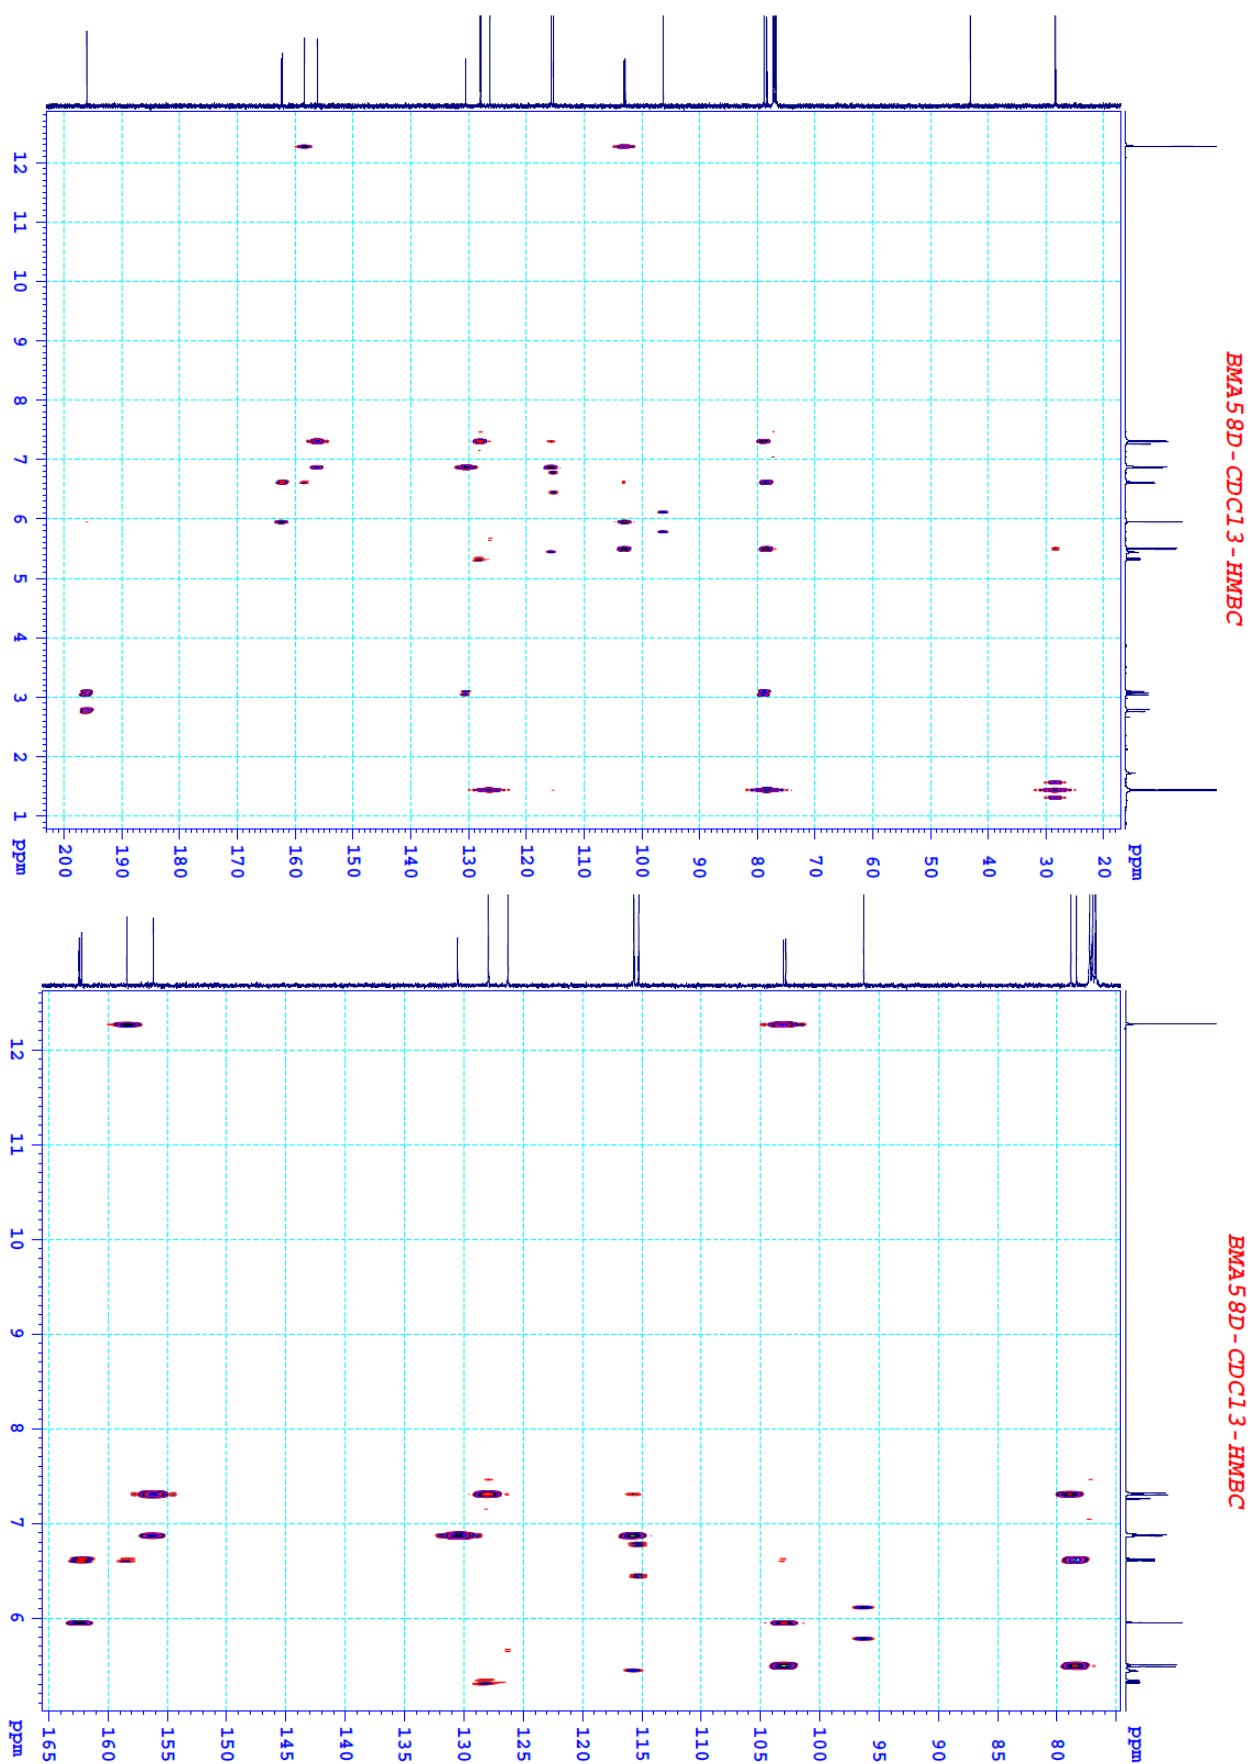

Figure S10. HMBC spectrum of compound 2

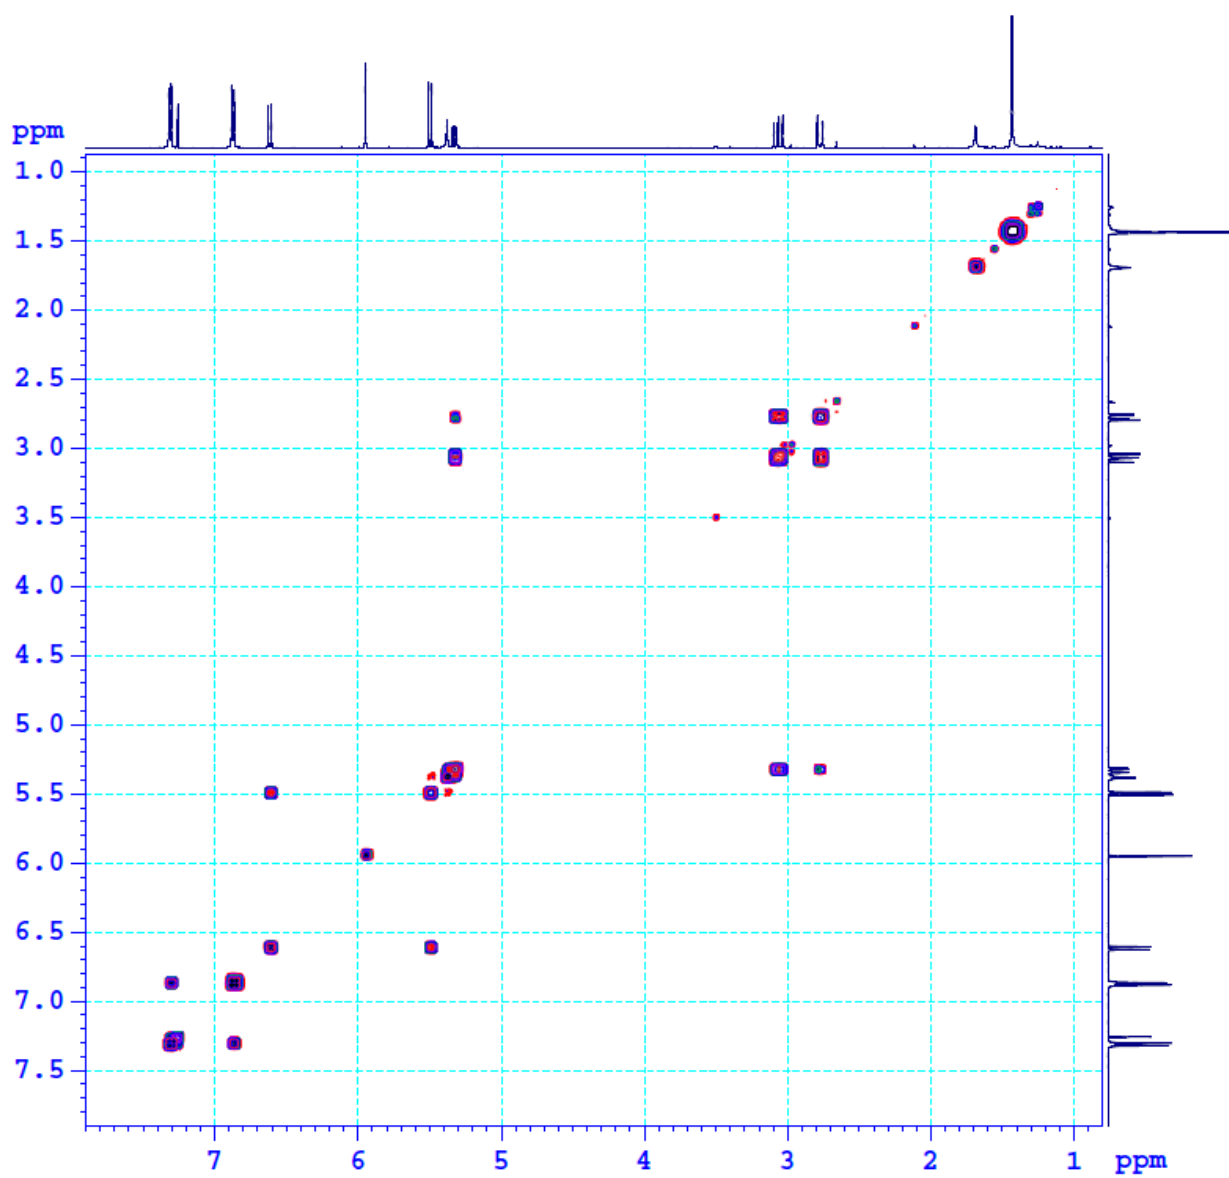

Figure S11. COSY spectrum of compound 2

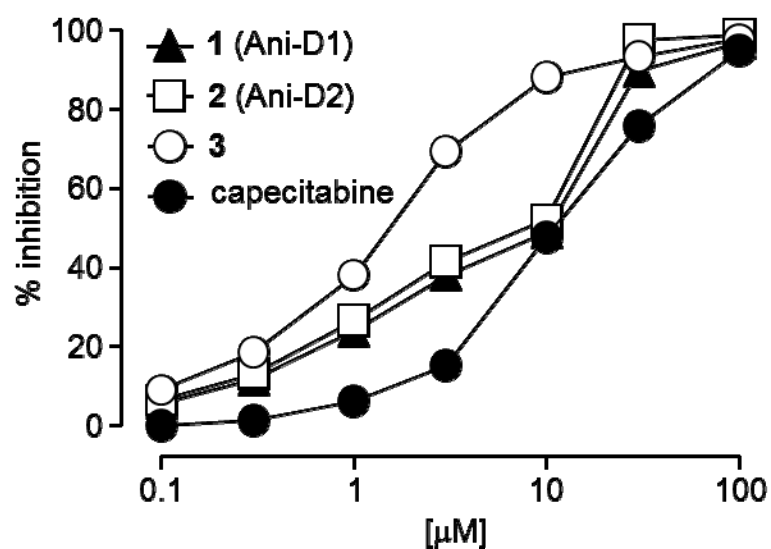

**Figure S12.** Dose response curve assessing the effect of compound 1-3 and capecitabine on cell viability in PC-3 cells. PC-3 cells were treated with compound 1-3 and capecitabine for 48 h, and the cell viability was determined using MTS assay kit (mean  $\pm$  S.E.,  $n = 3$ ).

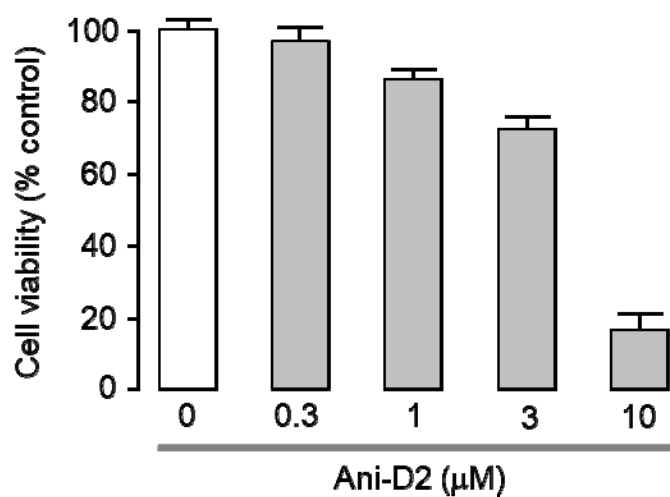

**Figure S13.** Effect of Ani-D2 on cell viability in HaCaT cells. Cells were treated with Ani-D2 at the indicated concentrations for 72 h, and cell viability was determined using MTS assay kit (mean  $\pm$  S.E.,  $n = 3$ ).
